# Supplementary material for: Electrochemical-driven water reduction and oxidation catalyzed by an iron(iii) complex supported by 2,3-bis(2-hydroxybenzylideneimino)-2,3-butenedinitrile
Source: Royal Society of Chemistry journal article supplement (doi:10.1039/c5ra05520b), 2015-01-01
Supplement: c5ra05520b1.pdf [file c5ra05520b1.pdf]

**Electrochemical-driven water reduction and oxidation catalyzed by an iron(III) complex supported by 2,3-bis(2-hydroxybenzylideneimino)-2,3-butenedinitrile**

Ling-Zhi Fu, Ling-Ling Zhou, Shu-Zhong Zhan\*

*College of Chemistry and Chemical Engineering, South China University of Technology, Guangzhou 510640, China*

**Supplementary Materials**

Table of context

|          |                                                                                                                                                                                                                                                                                                                                                                                                                                                                                                                   |
|----------|-------------------------------------------------------------------------------------------------------------------------------------------------------------------------------------------------------------------------------------------------------------------------------------------------------------------------------------------------------------------------------------------------------------------------------------------------------------------------------------------------------------------|
| <b>1</b> | <b>Fig. S1.</b> The UV spectrum of complex <b>1</b> in MeCN                                                                                                                                                                                                                                                                                                                                                                                                                                                       |
| <b>2</b> | <b>Fig. S2.</b> The UV spectrum of complex <b>1</b> in water.                                                                                                                                                                                                                                                                                                                                                                                                                                                     |
| <b>3</b> | <b>Fig. S3.</b> The UV spectra of 0.10 mM complex <b>1</b> in 0.25 M buffered solutions in different pHs.                                                                                                                                                                                                                                                                                                                                                                                                         |
| <b>4</b> | <b>Fig. S4.</b> Cyclic voltammogram of 3.17 mM ligand in 0.10 M of [n-Bu <sub>4</sub> N]ClO <sub>4</sub> DMF solution at a glassy carbon electrode and a scan rate of 100 mV/s. (*) Ferrocene internal standard.                                                                                                                                                                                                                                                                                                  |
| <b>5</b> | <b>Fig. S5.</b> (a) Scan rate dependence of precatalytic waves for a 3.17 mM solution of complex <b>1</b> in DMF, at scan rates from 50 to 250 mV/s. (b) Plot of current vs $v^{1/2}$ at -0.08 V (Fe <sup>III/II</sup> ) (blue line) and -1.55 V (Fe <sup>II/I</sup> ) (black line). Conditions: 0.10 M [n-Bu <sub>4</sub> N]ClO <sub>4</sub> as supporting electrolyte, GC working electrode (1.0 mm diameter), Pt counter electrode, Ag/AgNO <sub>3</sub> reference electrode, (*) ferrocene internal standard. |
| <b>6</b> | <b>Fig. S6.</b> CV of 3.17 mM FeCl <sub>3</sub> in 0.10 M of [n-Bu <sub>4</sub> N]ClO <sub>4</sub> DMF solution. GC working electrode (1 mm diameter), Pt counter electrode, Ag/AgNO <sub>3</sub> reference electrode, scan rate 100 mV/s.                                                                                                                                                                                                                                                                        |

|    |                                                                                                                                                                                                                                                                                                                                                                                                                                                                                                                                                                                 |
|----|---------------------------------------------------------------------------------------------------------------------------------------------------------------------------------------------------------------------------------------------------------------------------------------------------------------------------------------------------------------------------------------------------------------------------------------------------------------------------------------------------------------------------------------------------------------------------------|
| 7  | <b>Fig. S7.</b> CV of ligand (3.17 mM) and FeCl <sub>3</sub> (3.17 mM) (1:1) in 0.1 M of [n-Bu <sub>4</sub> N]ClO <sub>4</sub> DMF solution. GC working electrode (1 mm diameter), Pt counter electrode, Ag/AgNO <sub>3</sub> reference electrode, scan rate 100 mV/s.                                                                                                                                                                                                                                                                                                          |
| 8  | <b>Fig. S8.</b> Turnover frequency (mol H <sub>2</sub> /mol catalysts/h) for electrocatalytic hydrogen production by complex <b>1</b> (5.80 μM) under overpotentials.                                                                                                                                                                                                                                                                                                                                                                                                           |
| 9  | <b>Fig. S9.</b> Cyclic voltammograms of complex <b>1</b> (1.71 mM) in different pHs. Conditions: 0.25 M phosphate buffered solutions (KH <sub>2</sub> PO <sub>4</sub> + NaOH), GC working electrode (1.0 mm diameter), Pt wire counter electrode, Ag/AgCl reference electrode.                                                                                                                                                                                                                                                                                                  |
| 10 | <b>Fig. S10.</b> Cyclic voltammogram of complex <b>1</b> (1.05 mM) in different scan rate. Conditions: 0.25 M phosphate buffered solution (pH 7.0), GC working electrode (1.0 mm diameter), Pt wire counter electrode, Ag/AgCl reference electrode.                                                                                                                                                                                                                                                                                                                             |
| 11 | <b>Fig. S11.</b> Bubbles form                                                                                                                                                                                                                                                                                                                                                                                                                                                                                                                                                   |
| 12 | <b>Fig. S12.</b> (a) GC traces after a 1h controlled-potential electrolysis at -1.45 V vs Ag/AgCl of 17.4 μM complex <b>1</b> in 0.25 M buffer, pH 7.0. A standard of CH <sub>4</sub> was added for calibration purposes. (b) Measured (red) and calculated (black) pH changes assuming a 100% Faradic efficiency of complex <b>1</b> during electrolysis. (the theoretical pH change over time can be calculated by the equation of $pH = 14 + \lg \frac{\sum It}{FV}$ where I = current (A), t = time (s), F = Faraday constant (96485 C/mol), V = solution volume (0.04 L)). |
| 13 | <b>Fig. S13.</b> (a) Scan rate dependence of precatalytic waves for Fe <sup>IV/III</sup> and Fe <sup>V/IV</sup> couples from a 1.71 mM solution of complex <b>1</b> in buffer (pH 10.5), at scan rates from 50 to 200 mV/s. (b) Linear fitting plot of $i_{cat}$ vs $v^{-1/2}$ for Fe <sup>IV/III</sup> . (c) Linear fitting plot of $i_{cat}$ vs $v^{-1/2}$ for Fe <sup>V/IV</sup> .                                                                                                                                                                                           |

|    |                                                                                                                                                                                                                                                                                                                                                                                                                          |
|----|--------------------------------------------------------------------------------------------------------------------------------------------------------------------------------------------------------------------------------------------------------------------------------------------------------------------------------------------------------------------------------------------------------------------------|
| 14 | <b>Fig. S14.</b> (a) Scan rate dependence of precatalytic waves for a 1.71 mM solution of complex <b>1</b> in buffer (pH 10.5), at scan rates from 50 to 200 mV/s. (b) Linear fitting plot of $i_{\text{cat}}/i_{\text{d}}$ vs $v^{-1/2}$ ( $\text{Fe}^{\text{V/IV}}$ ) for TOF calculation. (c) Linear fitting plot of $i_{\text{cat}}/i_{\text{d}}$ vs $v^{-1/2}$ ( $\text{Fe}^{\text{IV/III}}$ ) for TOF calculation. |
| 15 | <b>Fig. S15.</b> Cyclic voltammograms of complex <b>1</b> in different concentrations.                                                                                                                                                                                                                                                                                                                                   |
| 16 | <b>Fig. S16.</b> ICP of a glassy carbon electrode after 4 h electrolysis. There was no significant change in the ICP after a 4 h electrolysis period.                                                                                                                                                                                                                                                                    |
| 17 | <b>Fig. S17.</b> ICP of an ITO electrode after 4 h electrolysis. There was no significant change in the ICP after a 4 h electrolysis period.                                                                                                                                                                                                                                                                             |
| 18 | <b>Eq. S1.</b> The calculation of TOF-1 (DMF)                                                                                                                                                                                                                                                                                                                                                                            |
| 19 | <b>Eq. S2.</b> The calculation of TOF-2 (Buffer, pH 7.0)                                                                                                                                                                                                                                                                                                                                                                 |
| 20 | <b>Eq. S3.</b> The calculation of TOF-3                                                                                                                                                                                                                                                                                                                                                                                  |
| 21 | <b>Eq. S4.</b> The calculation of TOF-4                                                                                                                                                                                                                                                                                                                                                                                  |
| 22 | <b>Table S1</b> Crystal data and structure refinement for complex <b>1</b>                                                                                                                                                                                                                                                                                                                                               |
| 23 | <b>Table S2</b> Selected bond lengths ( $\text{\AA}$ ) and angles ( $^\circ$ ) for <b>1</b>                                                                                                                                                                                                                                                                                                                              |

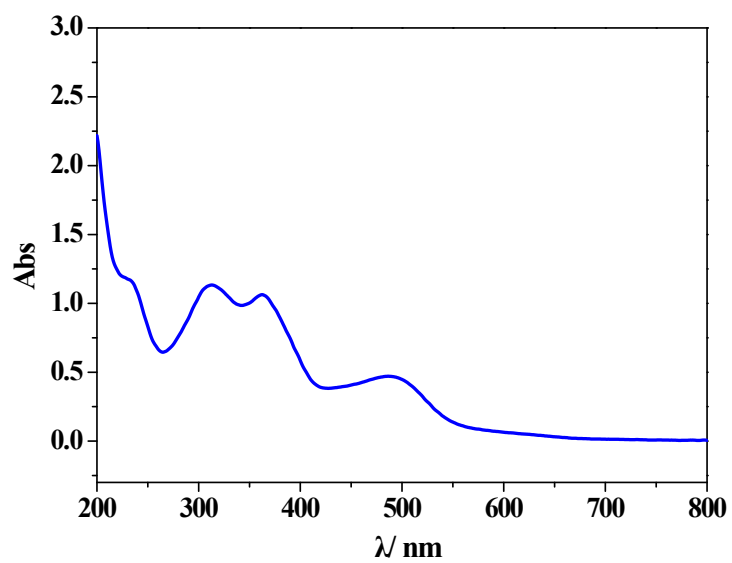

**Fig. S1.** The UV spectrum of complex **1** in MeCN.

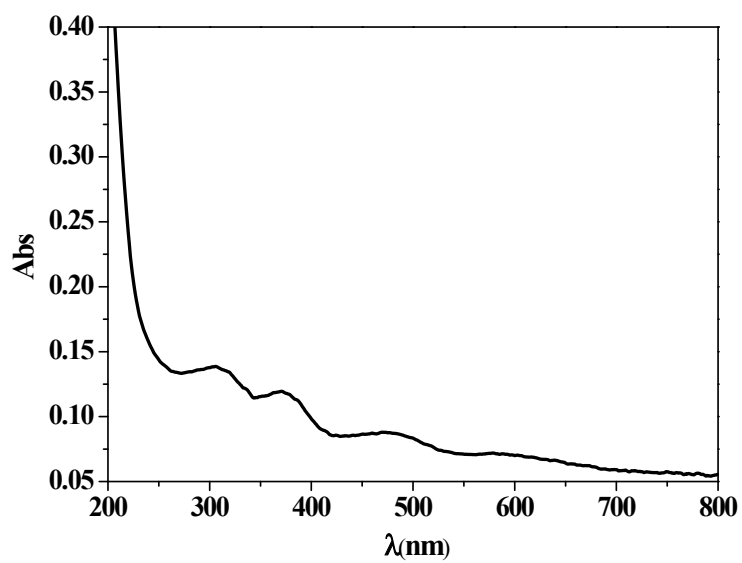

**Fig. S2.** The UV spectrum of complex **1** in water.

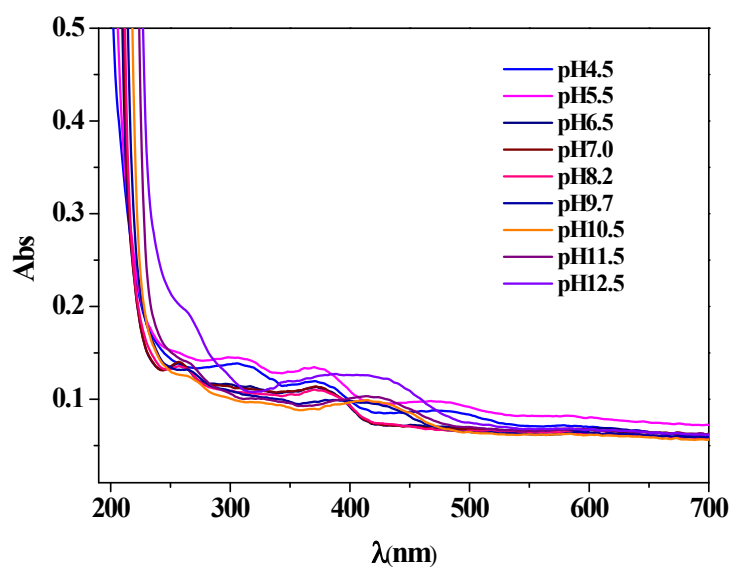

**Fig. S3.** The UV spectra of 0.10 mM complex **1** in 0.25 M buffered solutions in different pHs.

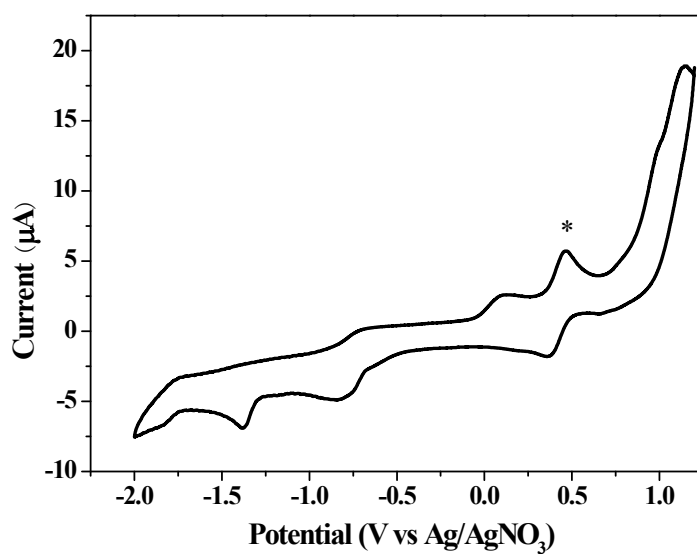

**Fig. S4.** Cyclic voltammogram of 3.17 mM ligand in 0.10 M of  $[n\text{-Bu}_4\text{N}]\text{ClO}_4$  DMF solution at a glassy carbon electrode and a scan rate of 100 mV/s. (\*) ferrocene internal standard.

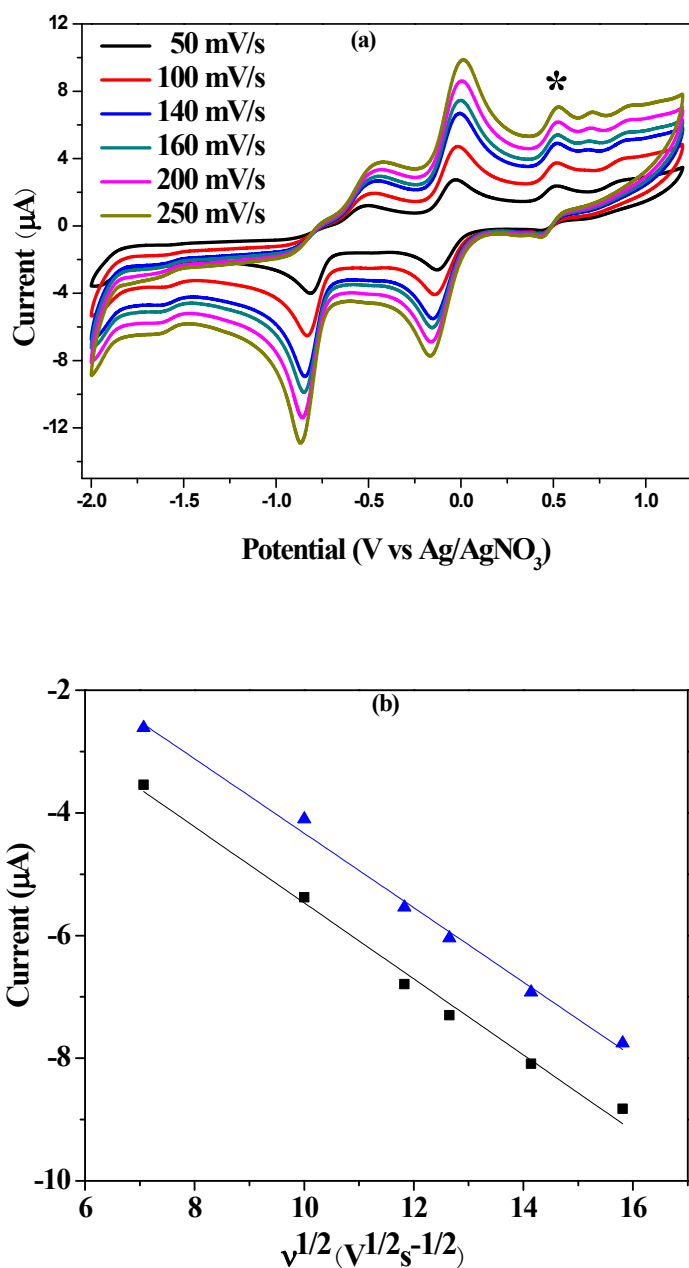

**Fig. S5.** (a) Scan rate dependence of precatalytic waves for a 3.17 mM solution of complex **1** in DMF, at scan rates from 50 to 250 mV/s. (b) Plot of current vs  $v^{1/2}$  at -0.08 V ( $\text{Fe}^{\text{III/II}}$ ) (blue line) and -1.55 V ( $\text{Fe}^{\text{II/I}}$ ) (black line). Conditions: 0.10 M [ $n\text{-Bu}_4\text{N}$ ]ClO<sub>4</sub> as supporting electrolyte, GC working electrode (1.0 mm diameter), Pt counter electrode, Ag/AgNO<sub>3</sub> reference electrode, (\*) ferrocene internal standard.

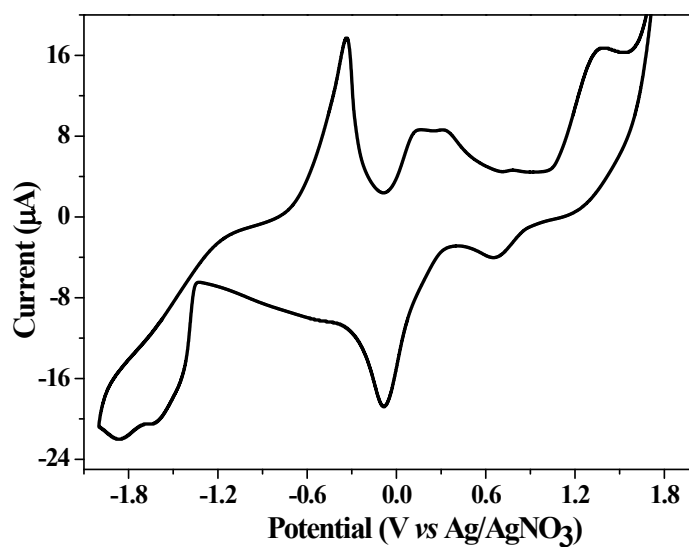

**Fig. S6.** CV of 3.17 mM FeCl<sub>3</sub> in 0.10 M of [n-Bu<sub>4</sub>N]ClO<sub>4</sub> DMF solution. GC working electrode (1.0 mm diameter), Pt counter electrode, Ag/AgNO<sub>3</sub> reference electrode, scan rate 100 mV/s.

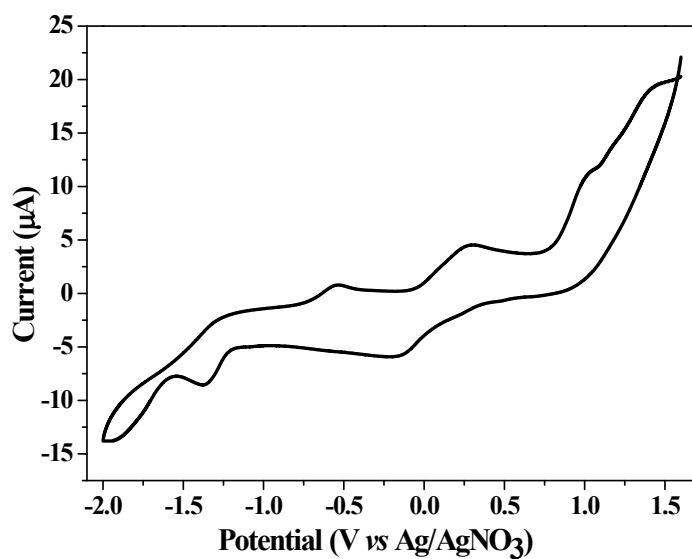

**Fig. S7.** CV of ligand (3.17 mM) and FeCl<sub>3</sub> (3.17 mM) (1:1) in 0.10 M of [n-Bu<sub>4</sub>N]ClO<sub>4</sub> DMF solution. GC working electrode (1.0 mm diameter), Pt counter electrode, Ag/AgNO<sub>3</sub> reference electrode, scan rate 100 mV/s.

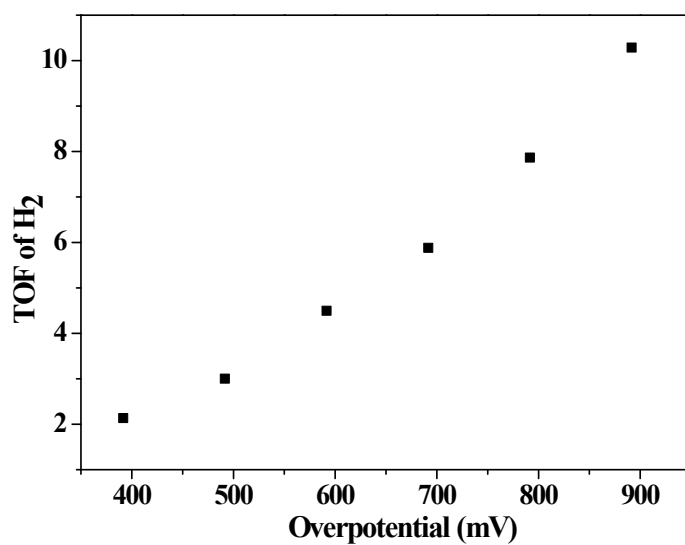

**Fig. S8.** Turnover frequency (mol H<sub>2</sub>/mol catalysts/h) for electrocatalytic hydrogen production by complex **1** (5.80  $\mu$ M) under overpotentials.

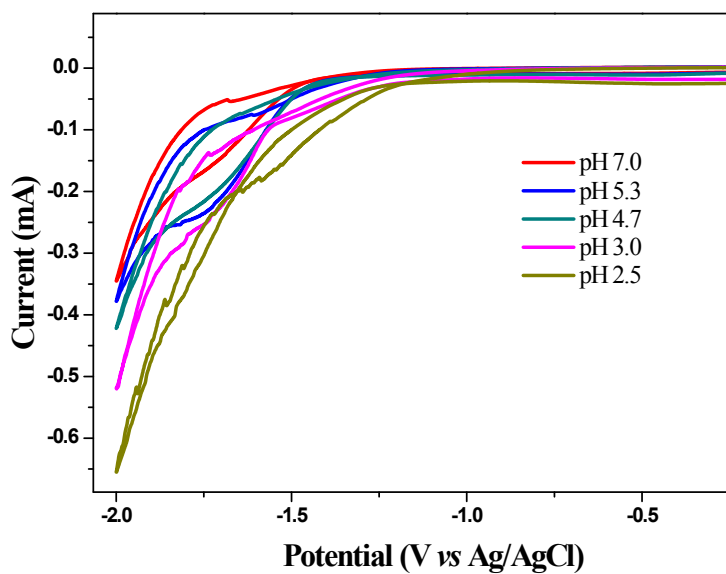

**Fig. S9.** Cyclic voltammograms of complex **1** (1.71 mM) in different pHs. Conditions: 0.25 M phosphate buffered solutions (KH<sub>2</sub>PO<sub>4</sub> + NaOH), GC working electrode (1.0 mm diameter), Pt wire counter electrode, Ag/AgCl reference electrode.



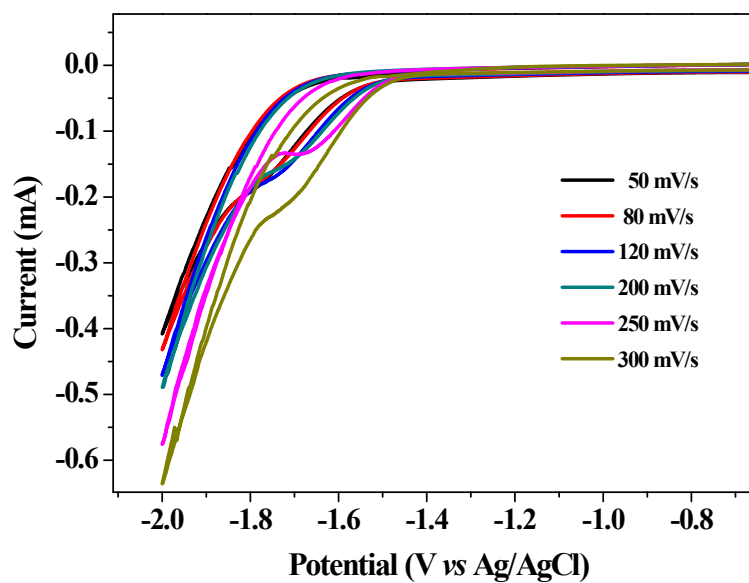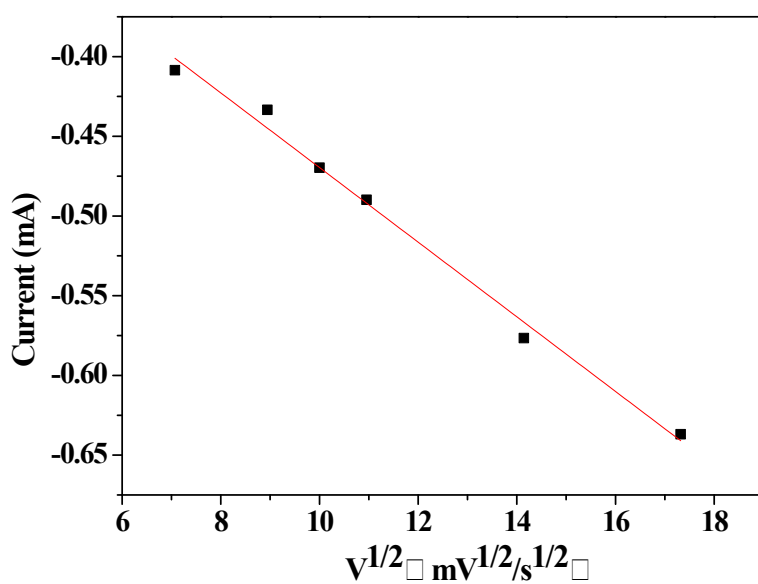

**Fig. S10.** Cyclic voltammogram of complex **1** (1.05 mM) in different scan rate. Conditions: 0.25 M phosphate buffered solution (pH 7.0), GC working electrode (1.0 mm diameter), Pt wire counter electrode, Ag/AgCl reference electrode.

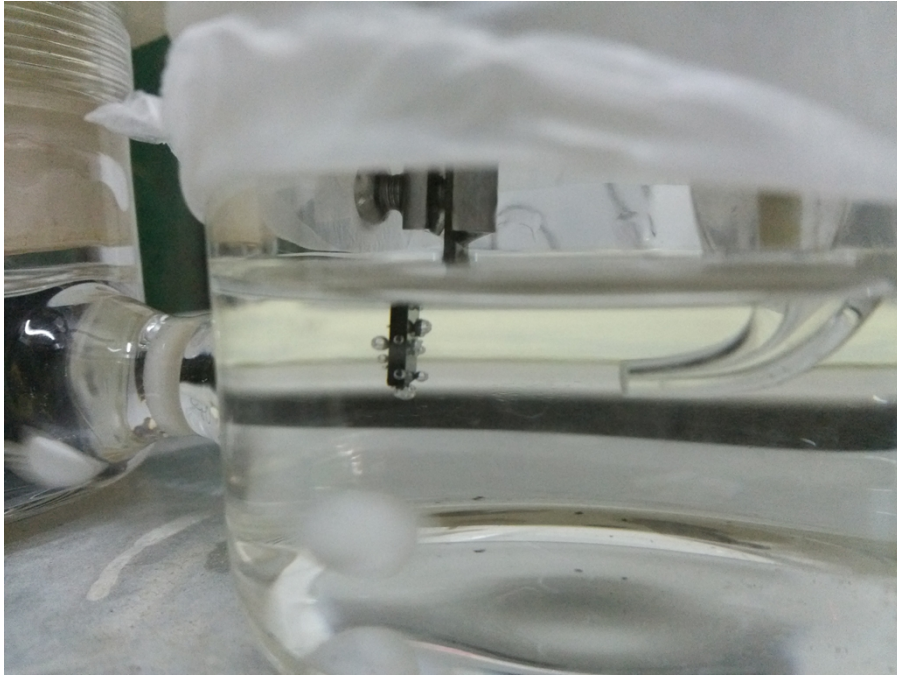

**Fig. S11.** Bubble forms

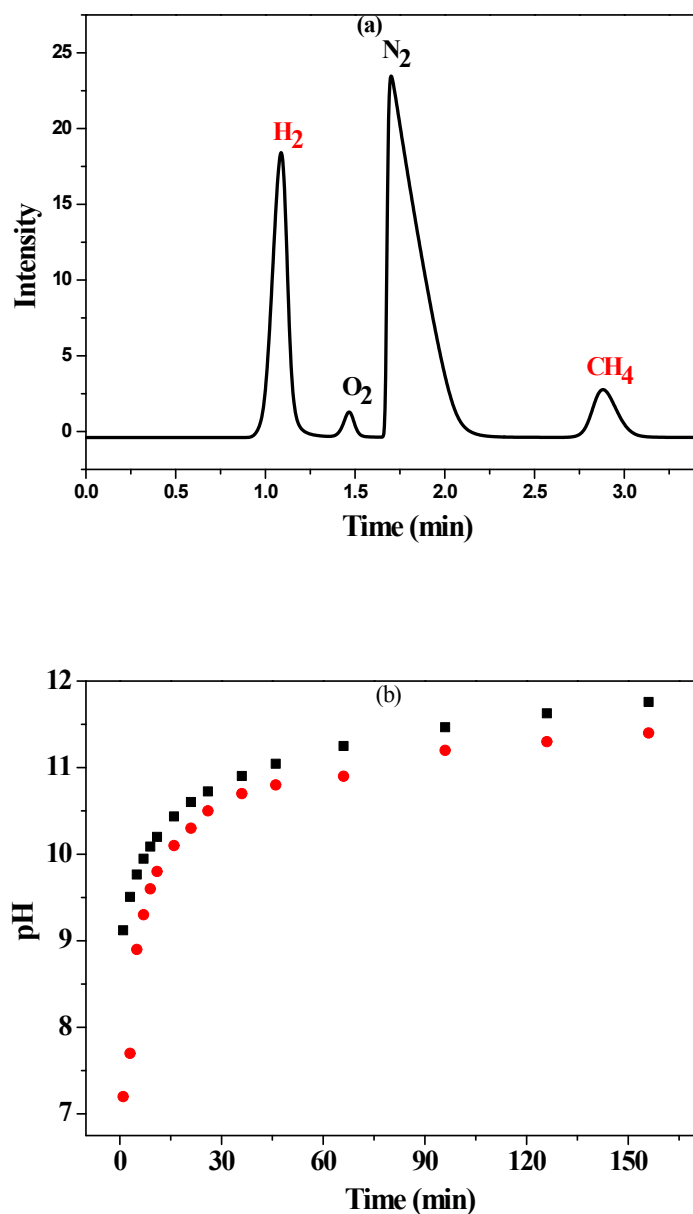

**Fig. S12.** (a) GC traces after a 1h controlled-potential electrolysis at  $-1.45$  V vs Ag/AgCl of  $17.4$   $\mu$ M complex **1** in  $0.25$  M buffer, pH 7.0. A standard of CH<sub>4</sub> was added for calibration purposes. (b) Measured (red) and calculated (black) pH changes assuming a 100% Faradic efficiency of complex **1** during electrolysis. (the theoretical

pH change over time can be calculated by the equation of  $pH = 14 + \lg \frac{\sum It}{FV}$  where I = current (A), t = time (s), F = Faraday constant (96485 C/mol), V = solution volume (0.04 L)).

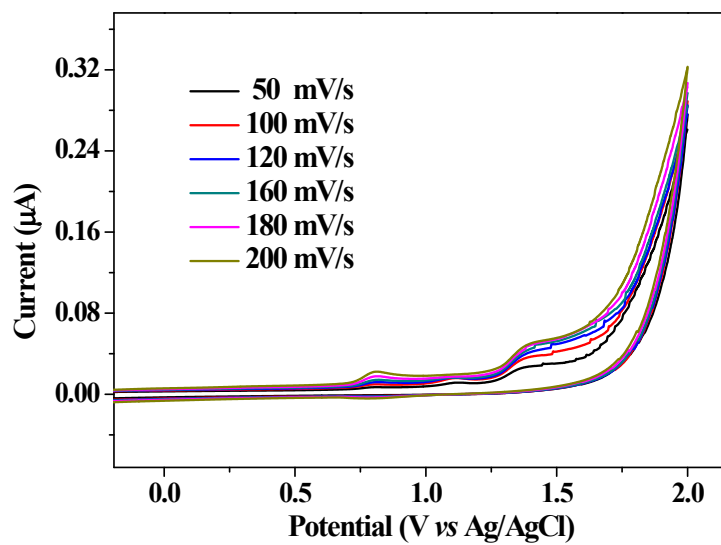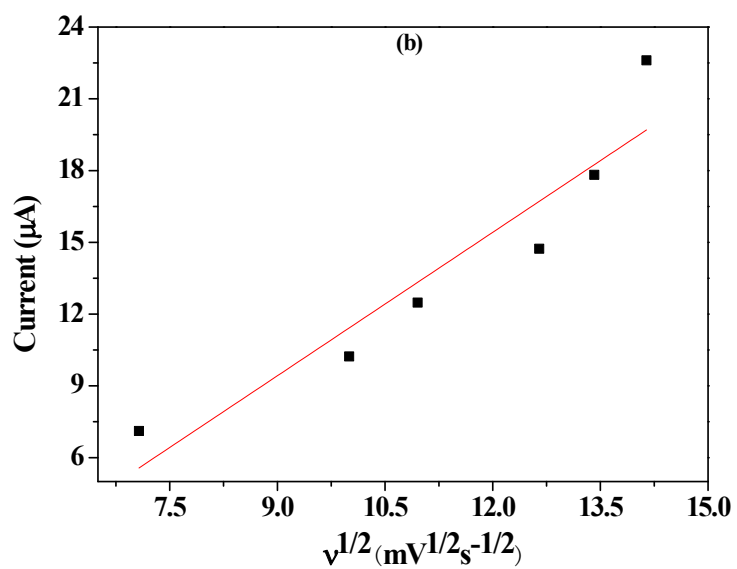

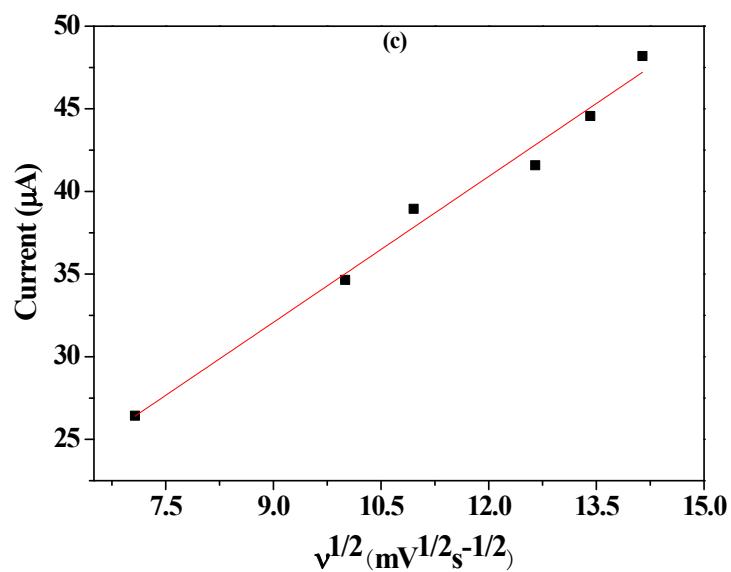

**Fig. S13.** (a) Scan rate dependence of precatalytic waves for  $\text{Fe}^{\text{IV/III}}$  and  $\text{Fe}^{\text{V/IV}}$  couples from a 1.71 mM solution of complex **1** in buffer (pH 10.5), at scan rates from 50 to 200 mV/s. (b) Linear fitting plot of  $i_{\text{cat}}$  vs  $v^{-1/2}$  for  $\text{Fe}^{\text{IV/III}}$ . (c) Linear fitting plot of  $i_{\text{cat}}$  vs  $v^{-1/2}$  for  $\text{Fe}^{\text{V/IV}}$ .

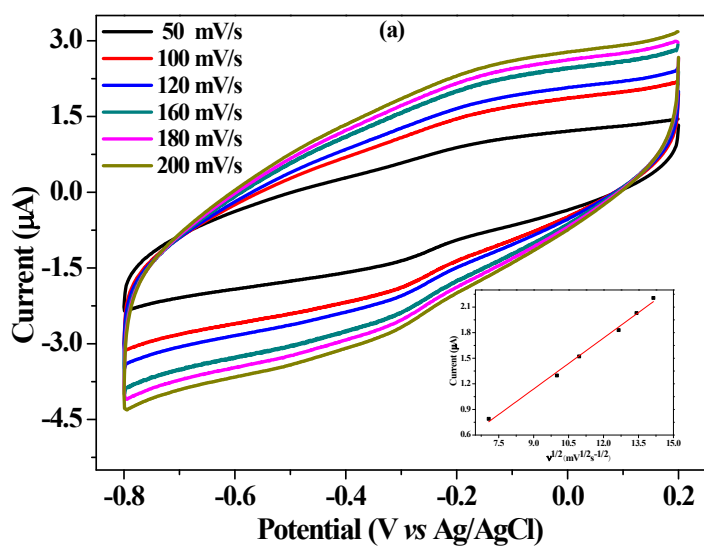

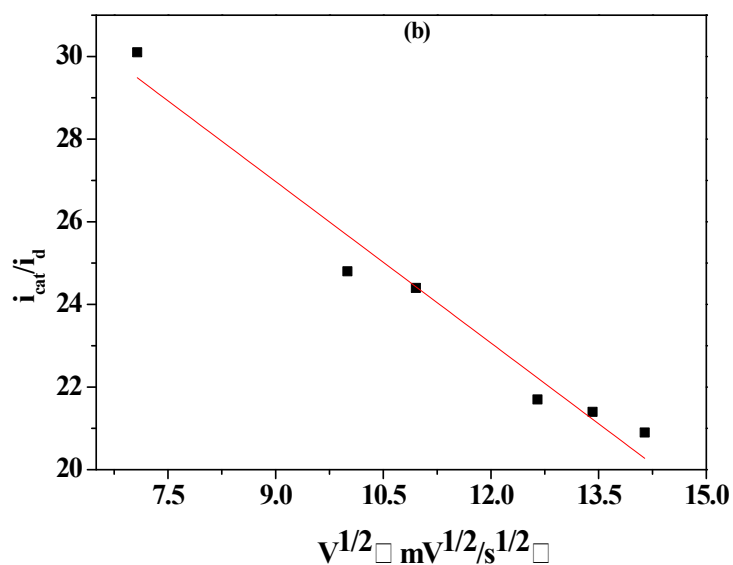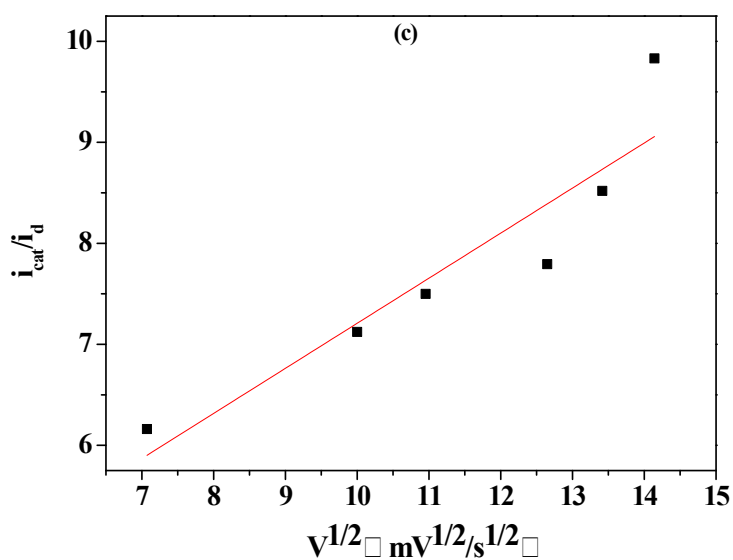

**Fig. S14.** (a) Scan rate dependence of precatalytic wave for a 1.71 mM solution of complex **1** in buffer (pH 10.5), at scan rates from 50 to 200 mV/s. (b) Linear fitting plot of  $i_{cat}/i_d$  vs  $v^{-1/2}$  ( $Fe^{V/IV}$ ) for TOF calculation. (c) Linear fitting plot of  $i_{cat}/i_d$  vs  $v^{-1/2}$  ( $Fe^{IV/III}$ ) for TOF calculation.

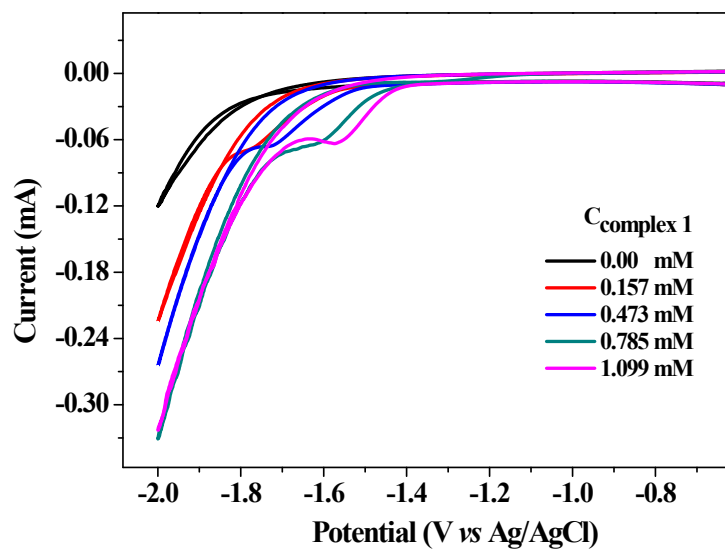

Fig. S15. Cyclic voltammograms of complex I in different concentrations.

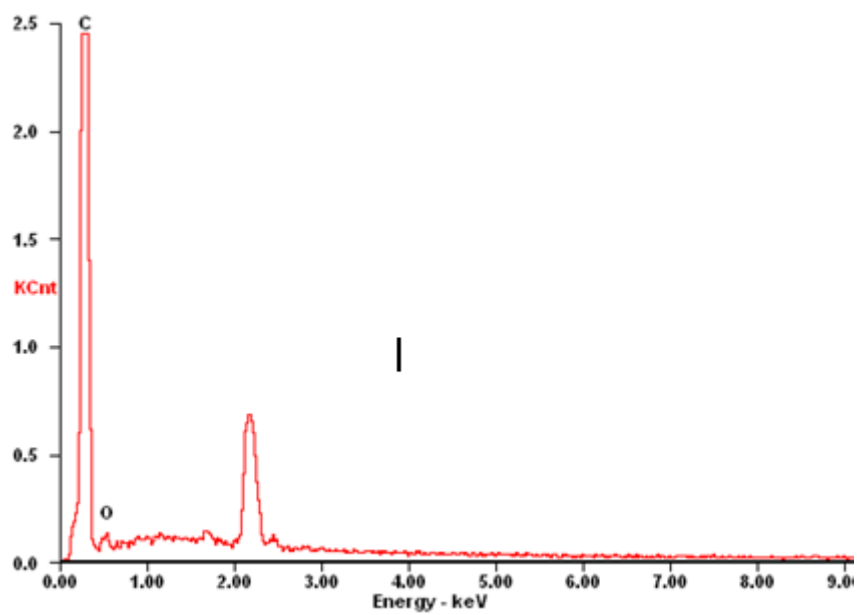

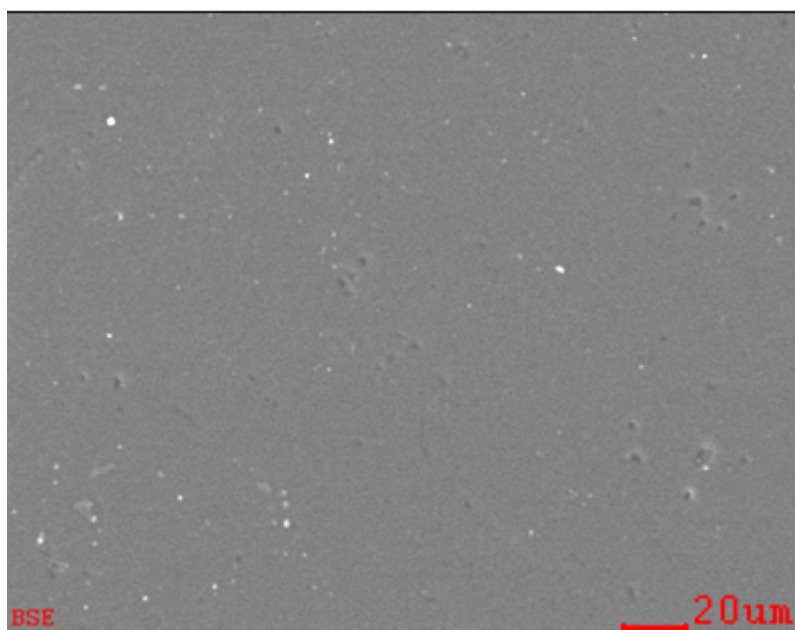

**Fig. S16.** ICP of a glassy carbon electrode after 4 h electrolysis. There was no significant change in the ICP after a 4 h electrolysis period.

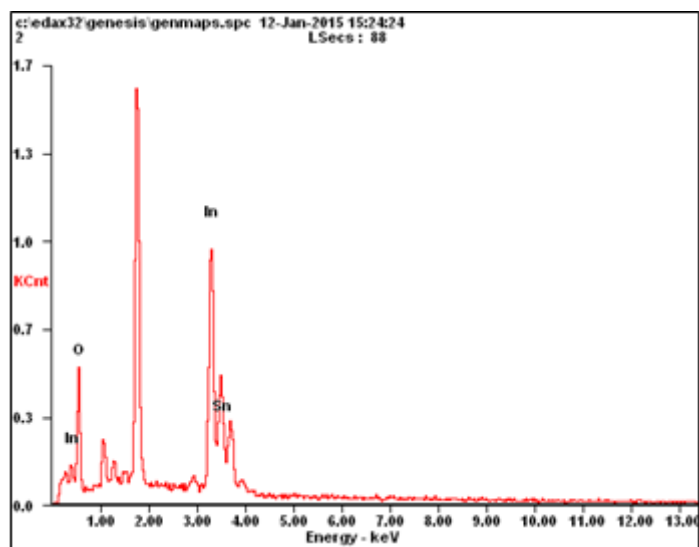



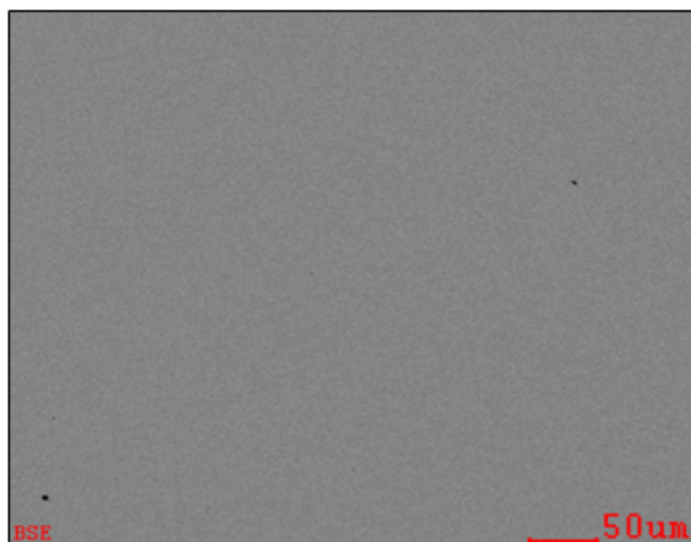

**Fig. S17.** ICP of an ITO electrode after 4 h electrolysis. There was no significant change in the ICP after a 4 h electrolysis period.

$$TOF = \frac{\Delta C}{F \cdot n_1 \cdot n_2 \cdot t} = \frac{0.01535C \times 3600}{96480C \cdot mol^{-1} \times 2 \times 0.232 \times 10^{-6} mol \times 120} = 10.25h^{-1}$$

**Eq. S1.** The calculation of TOF-1 (DMF)

$$TOF = \frac{\Delta C}{F \cdot n_1 \cdot n_2 \cdot t} = \frac{0.624C \times 3600}{96480C \cdot mol^{-1} \times 2 \times 0.12 \times 10^{-6} mol \times 120} = 808.46h^{-1}$$

**Eq. S2.** The calculation of TOF-2 (Buffer, pH 7.0)

$$\frac{i_c}{i_p} = 0.359 \frac{n_c}{n_p^{3/2}} \sqrt{k_{cat} / \nu} \quad (2)$$

$$y = 0.4463x - 2.7450$$

$$n=4; n_p = 1$$

$$\frac{i_c}{i_p} = 0.359 \frac{n_c}{n_p^{3/2}} \sqrt{k_{cat} / \nu} = 1.413 \sqrt{k_{cat}} \times \nu^{-1/2}$$

$$1.413 \sqrt{k_{cat}} = 0.4463$$

$$k_{cat} = 0.01s^{-1}$$

**Eq. S3.** The calculation of TOF-3

$$\frac{i_c}{i_p} = 0.359 \frac{n_c}{n_p^{3/2}} \sqrt{k_{cat} / \nu} \quad (2)$$

$$y = -1.302x - 38.697$$

$$n=4; n_p=1$$

$$\frac{i_c}{i_p} = 0.359 \frac{n_c}{n_p^{3/2}} \sqrt{k_{cat} / \nu} = 1.413 \sqrt{k_{cat}} \times \nu^{-1/2}$$

$$1.413 \sqrt{k_{cat}} = -1.302$$

$$k_{cat} = 0.849 s^{-1}$$

**Eq. S4.** The calculation of TOF-4

**Table S1** Crystal data and structure refinement for complex **1**

| Crystal data                      | Complex <b>1</b>                                                  |
|-----------------------------------|-------------------------------------------------------------------|
| Empirical formula                 | C <sub>18</sub> H <sub>12</sub> ClFeN <sub>4</sub> O <sub>3</sub> |
| Formula weight                    | 423.62                                                            |
| Temperature/K                     | 293(2)                                                            |
| $\lambda$ (Å)                     | 0.71073                                                           |
| Crystal system                    | Triclinic                                                         |
| Space group                       | P-1                                                               |
| a/Å                               | 6.9901(7)                                                         |
| b/Å                               | 10.9240(11)                                                       |
| c/Å                               | 12.1442(13)                                                       |
| $\alpha$ /°                       | 97.445(2)                                                         |
| $\beta$ /°                        | 98.875(2)                                                         |
| $\gamma$ /°                       | 105.900(2)                                                        |
| V/Å <sup>3</sup>                  | 866.64(15)                                                        |
| Z                                 | 2                                                                 |
| Dc/Mgm <sup>-3</sup>              | 1.623                                                             |
| F(000)                            | 430                                                               |
| range for data collection         | 2.37 to 27.60deg                                                  |
| Reflections collected/unique      | 10846/3948                                                        |
| Goodness-of-fit on F <sup>2</sup> | 1.043                                                             |
| Final R indices [I>2sigma(I)]     | R <sub>1</sub> = 0.0306<br>wR <sub>2</sub> = 0.0870               |
| R indices (all data)              | R <sub>1</sub> = 0.0395<br>wR <sub>2</sub> = 0.0922               |

**Table S2** Selected bond lengths (Å) and angles (°) for **1**

---

|                  |            |                 |            |
|------------------|------------|-----------------|------------|
| Fe(1)-O(2)       | 1.8791(14) | Fe(1)-O(1)      | 1.9086(13) |
| Fe(1)-N(3)       | 2.1263(15) | Fe(1)-N(4)      | 2.1317(15) |
| Fe(1)-O(3)       | 2.2086(13) | Fe(1)-Cl(1)     | 2.3098(6)  |
| <br>             |            |                 |            |
| O(2)-Fe(1)-O(1)  | 103.59(6)  | O(2)-Fe(1)-N(3) | 162.05(6)  |
| O(1)-Fe(1)-N(3)  | 88.82(6)   | O(2)-Fe(1)-N(4) | 87.98(6)   |
| O(1)-Fe(1)-N(4)  | 162.52(6)  | N(3)-Fe(1)-N(4) | 77.20(6)   |
| O(2)-Fe(1)-O(3)  | 86.39(6)   | O(1)-Fe(1)-O(3) | 86.53(6)   |
| N(3)-Fe(1)-O(3)  | 81.40(5)   | N(4)-Fe(1)-O(3) | 81.10(6)   |
| O(3)-Fe(1)-Cl(1) | 171.71(4)  |                 |            |

---
